# Supplementary material
Source: PubMed Central journal article supplement (PMC5005919)
Supplement: 11357_2016_9927_MOESM2_ESM.pdf [file 11357_2016_9927_MOESM2_ESM.pdf]

**ADDITIONAL MATERIAL (2)**

**Supplementary Table 1. The summary of DNAmAge values among samples collected in YFS in 1986 and 2011.** The values were categorized by cAge and gender. The gender-wise differences in DNAmAge values within the cAge groups did not meet statistical significance (Mann Whitney U-test,  $P > 0.05$ ).

|                                              | YFS in 1986     |                 |                 |                 | YFS in 2011     |                 |                 |                 |
|----------------------------------------------|-----------------|-----------------|-----------------|-----------------|-----------------|-----------------|-----------------|-----------------|
| <b>cAge</b>                                  | <b>15</b>       | <b>18</b>       | <b>21</b>       | <b>24</b>       | <b>40</b>       | <b>43</b>       | <b>46</b>       | <b>49</b>       |
| <b>N (N, women)</b>                          | 49<br>(29)      | 44<br>(30)      | 55<br>(31)      | 35<br>(21)      | 49<br>(29)      | 44<br>(30)      | 55<br>(31)      | 35<br>(21)      |
| <b>median (MAD) of DNAmAge values, men</b>   | 13.42<br>(2.35) | 15.78<br>(1.70) | 18.68<br>(2.57) | 21.12<br>(5.14) | 37.34<br>(3.82) | 40.02<br>(1.21) | 41.51<br>(3.62) | 44.92<br>(2.71) |
| <b>median (MAD) of DNAmAge values, women</b> | 13.50<br>(1.21) | 16.15<br>(2.84) | 20.09<br>(2.40) | 22.52<br>(4.28) | 37.81<br>(2.93) | 39.19<br>(3.44) | 42.88<br>(2.07) | 43.38<br>(4.83) |

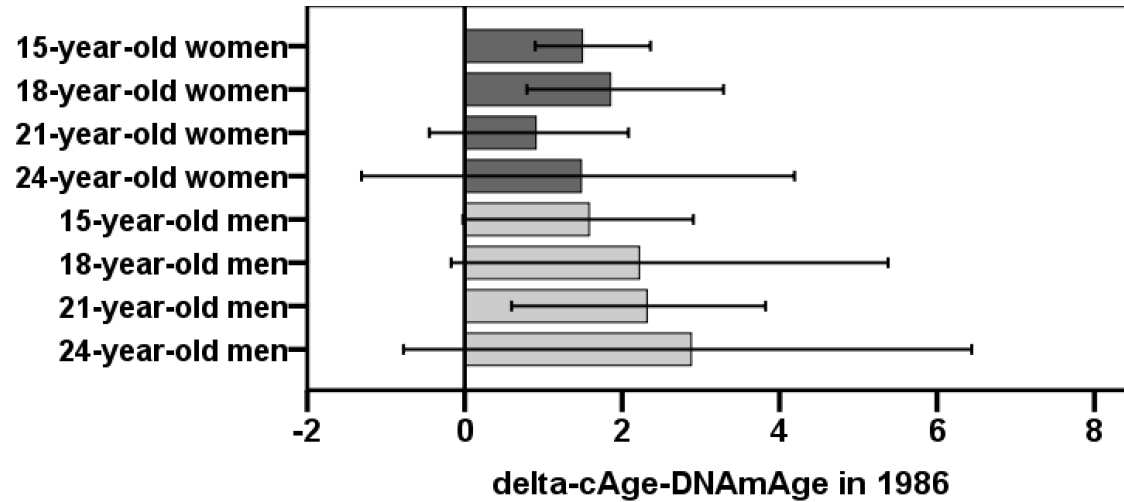

**Supplementary figure 1. The differences between cAge and DNAmAge ( $\Delta$ -cAge-DNAmAge) in the Young Finns study among samples collected in 1986 are shown as bars. Sample origin was whole blood leukocytes. Each bar illustrate gender-wise median of  $\Delta$ -cAge-DNAmAge within a cAge group. Error bars correspond to 95% confidence intervals.**

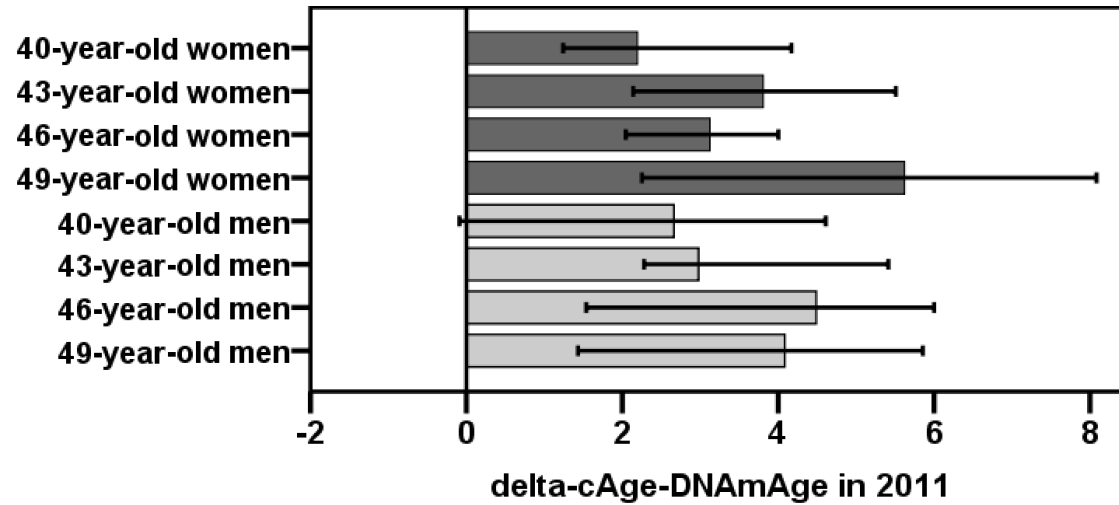

**Supplementary figure 2. The differences between cAge and DNAmAge ( $\Delta$ -cAge-DNAmAge) in the Young Finns study among samples collected in 2011 are shown as bars.** Sample origin was whole blood leukocytes. Each bar illustrate gender-wise median of  $\Delta$ -cAge-DNAmAge within a cAge group. Error bars correspond to 95% confidence intervals.

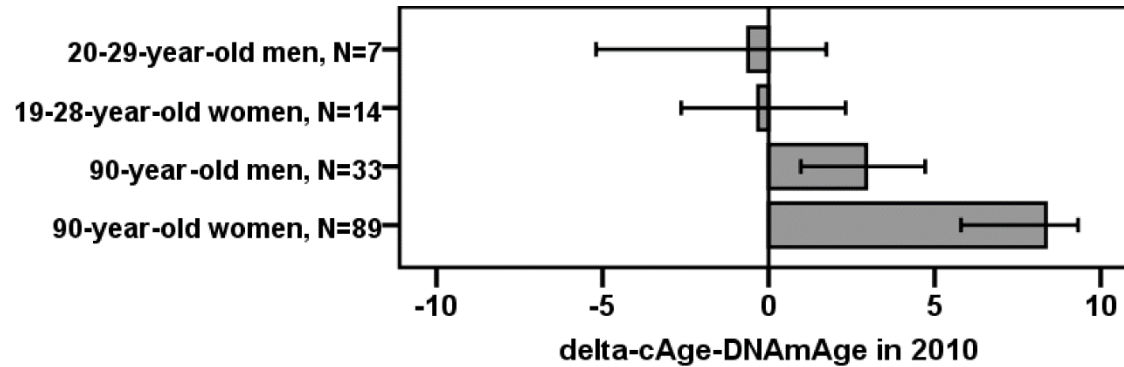

**Supplementary figure 3. The differences between cAge and DNAmAge ( $\Delta$ -cAge-DNAmAge) in the Vitality 90+ study among samples collected in 2010 are shown as bars.** Sample origin was peripheral blood mononuclear cells. Each bar illustrate gender-wise median of  $\Delta$ -cAge-DNAmAge within a cAge group. Error bars correspond to 95% confidence intervals.

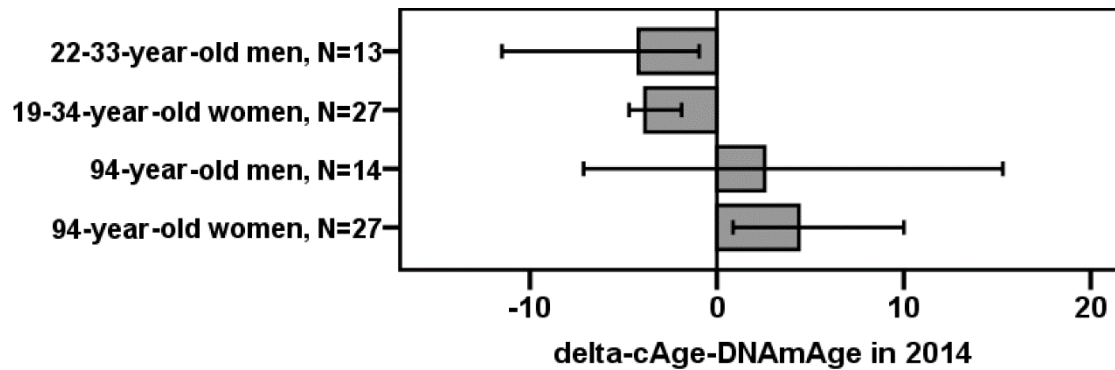

**Supplementary figure 4. The differences between cAge and DNAmAge ( $\Delta$ -cAge-DNAmAge) in the Vitality 90+ study among samples collected in 2014 are shown as bars.** Each bar illustrate gender-wise median of  $\Delta$ -cAge-DNAmAge within a cAge group. Sample origin was peripheral blood mononuclear cells. Error bars correspond to 95% confidence intervals.
